# Supplementary material for: Interconnected nanofibrous titanium dioxide bronze: an emerging lithium ion anode material for high rate performance
Source: Royal Society of Chemistry journal article supplement (doi:10.1039/c2ra22847e), 2012-12-18
Supplement: c2ra22847e.pdf [file c2ra22847e.pdf]

## Supplementary Information

**Interconnected Nanofibrous Titanium Dioxide Bronze:**

**An Emerging Lithium Ion Anode Material for High Rate Performance**

Chad W. Mason,<sup>a</sup> Ivan Yeo,<sup>b</sup> Kuppan Saravanan,<sup>a</sup> and Palani Balaya.<sup>a,b\*</sup>

<sup>a</sup>*Department of Mechanical Engineering, National University of Singapore, Singapore 117576.*

<sup>b</sup>*Engineering Science Programme, National University of Singapore, Singapore 117576.*

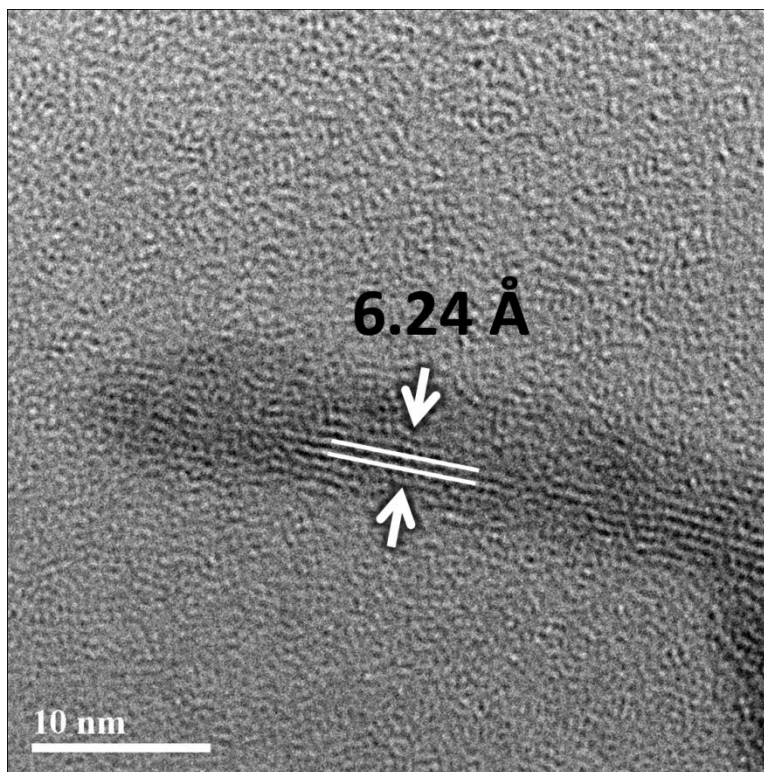

SI Figure 1. Supplementary HRTEM Image

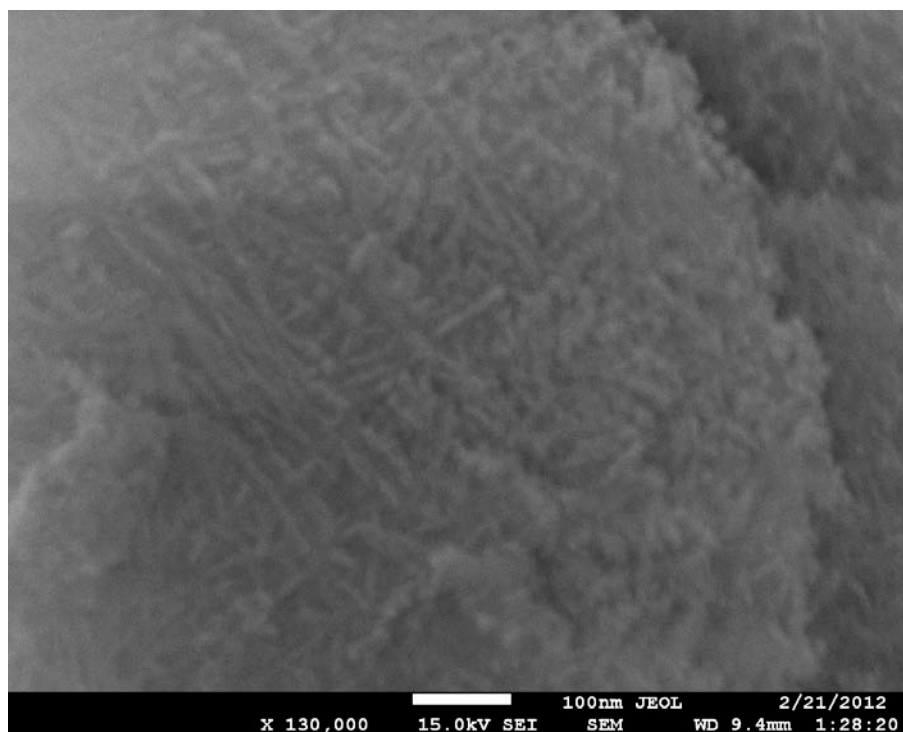

SI Figure 2. SEM Image of TiO<sub>2</sub>-B nanotubes without mesoporosity

**SI Table 1.** Charge capacity at various rates with varying carbon contents in composite electrode. First discharge capacity at C/5 was inconsistent and varied between 282 and 312 mAh.g<sup>-1</sup>.

|                         | C/10 | C/5 | 1C  | 10C | 20C | 100C |
|-------------------------|------|-----|-----|-----|-----|------|
| 5% Carbon               | 251  | 235 | 212 | 183 | 148 | 66   |
| 10% Carbon              | -    | 238 | 217 | -   | 155 | -    |
| 15% Carbon              | -    | 237 | 219 | -   | 159 | -    |
| 5% Carbon, Without CTAB | -    | 184 | -   | -   | 82  | -    |

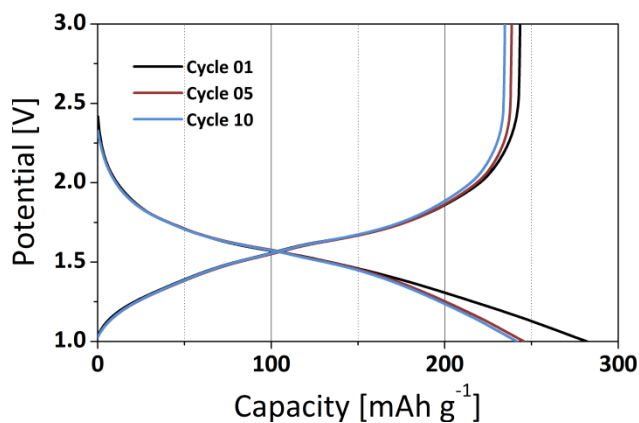

**SI Figure 3.** Cycling at C/5, with first discharge shown.

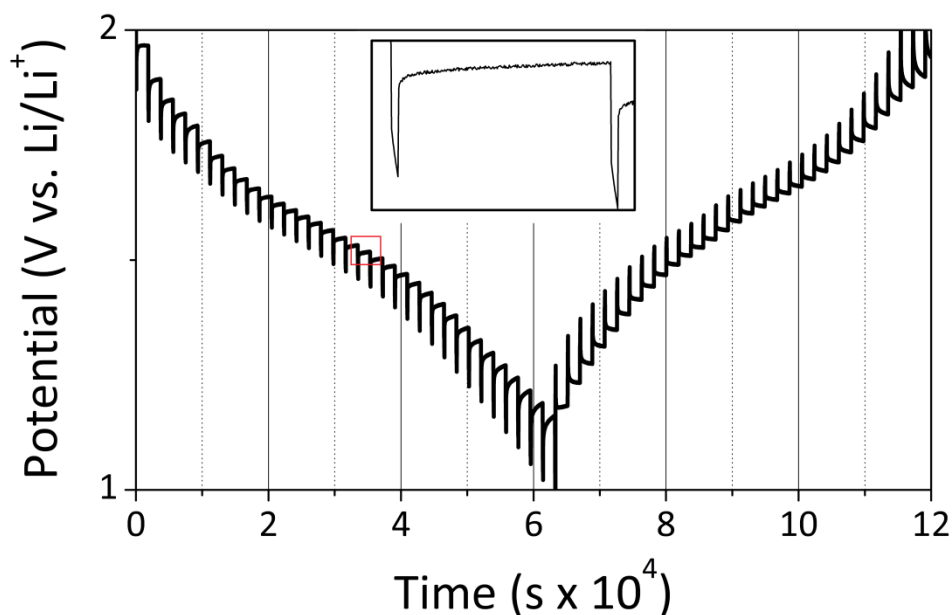

**SI Figure 4.** Galvanostatic Intermittent Titration Technique (GITT) Discharge and Charge Curves, respectively. Single pulse shown in inset.
